# Supplementary material for: Dynamic Changes in Drinking Behaviour among Subpopulations of Youth during the COVID-19 Pandemic: A Prospective Cohort Study
Source: MDPI journal article supplement (doi:10.3390/healthcare11131945), 2023-07-05
Supplement: s1 [file s1]

### Supplementary Tables

Supplementary Table S1. Comparison of characteristics of linked and non-linked data from students attending the 81 linked-longitudinal COMPASS secondary schools across the three study waves (2018/19, 2019/20, and 2020/21).

|                | Linked<br>(n= 5368) | Non-linked<br>(n=42286) | P ( $\chi^2$ /t-test) |
|----------------|---------------------|-------------------------|-----------------------|
| Sex (female)   | 60.2 (3211)         | 48.1% (20,065)          | <0.001                |
| Age            |                     |                         | <0.001                |
| 12-13          | 36.9 (1974)         | 19.36% (7,841)          |                       |
| 14             | 36.3 (1944)         | 30.2 (12312)            |                       |
| 15-18          | 26.7 (1427)         | 50.5 (20559)            |                       |
| Race/ethnicity |                     |                         | <0.001                |
| White          | 79.9 (4288)         | 70.6 (29843)            |                       |
| Black          | 1.8 (95)            | 4.2 (1768)              |                       |
| Asian          | 6.2 (332)           | 7.7 (3256)              |                       |
| Latin/Hispanic | 1.0 (54)            | 2.4 (1015)              |                       |
| Mixed/Others   | 11.2 (599)          | 15.1 (6404)             |                       |
| Drinking level |                     |                         | <0.001                |
| None           | 66.5 (3539)         | 55.1 (22916)            |                       |
| Occasional     | 16.8 (896)          | 18.5 (7666)             |                       |
| Monthly        | 13.9 (740)          | 19.2 (7997)             |                       |
| Weekly         | 2.8 (149)           | 7.2 (2981)              |                       |
| Binge drinking |                     |                         | <0.001                |
| None           | 84.2 (4516)         | 73.1 (30824)            |                       |
| Occasional     | 9.4 (506)           | 13.1 (559)              |                       |

|         |           |             |
|---------|-----------|-------------|
| Monthly | 5.7 (303) | 10.8 (4532) |
| Weekly  | 0.7 (35)  | 3.0 (1258)  |

Supplementary Table S2. Latent transition model fit indices

|         | -Log<br>likelihood | G <sup>2</sup> | df   | AIC    | Adjusted<br>BIC |
|---------|--------------------|----------------|------|--------|-----------------|
| Overall |                    |                |      |        |                 |
| 2-class | 24707.4            | 5649.0         | 4078 | 5683.0 | 5794.9          |
| 3-class | 23186.3            | 2606.9         | 4063 | 2670.9 | 2881.7          |
| 4-class | 22755.7            | 1745.6         | 4044 | 1847.6 | 2183.6          |
| 5-class | 22578.8            | 1381.8         | 4021 | 1529.8 | 2017.3          |
| 6-class | 22498.8            | 1231.9         | 3994 | 1433.9 | 2099.3          |
| FEMALES |                    |                |      |        |                 |
| 2-class | 15113.7            | 3564.4         | 4078 | 3598.4 | 3701.7          |
| 3-class | 14218.1            | 1773.0         | 4063 | 1836.9 | 2031.5          |
| 4-class | 14032.1            | 1401.0         | 4044 | 1503.0 | 1813.0          |
| 5-class | 13860.1            | 1057           | 4021 | 1205   | 1654.9          |
| 6-class | 13816.2            | 969.3          | 3994 | 1171.3 | 1785.3          |
| MALES   |                    |                |      |        |                 |
| 2-class | 9488.2             | 2715.3         | 4078 | 2749.3 | 2845.6          |
| 3-class | 8845.2             | 1429.4         | 4063 | 1493.4 | 1674.7          |
| 4-class | 8670.4             | 1079.7         | 4044 | 1181.6 | 1470.7          |
| 5-class | 8600.3             | 939.5          | 4021 | 1087.5 | 1506.9          |
| 6-class | 8558.4             | 855.8          | 3994 | 1057.8 | 1630.3          |

G<sup>2</sup>: Likelihood ratio statistics; df: degrees of freedom; AIC: Akaike Information Criteria; BIC: Bayesian Information Criteria.

Supplementary Table S3. Comparison of transition probabilities between latent statuses of youth alcohol consumption among two cohorts during one year before the COVID-19 pandemic and two years during the pandemic in females and males attending the 81 linked-longitudinal COMPASS schools across the three study waves (2018/19, 2019/20, and 2020/21)

| Cohort                           | Abstainer   |             | Occasional drinker-no<br>binging |             | Occasional binge<br>drinker |             | Monthly binge<br>drinker |             | Weekly binge drinker |             |
|----------------------------------|-------------|-------------|----------------------------------|-------------|-----------------------------|-------------|--------------------------|-------------|----------------------|-------------|
|                                  | T2a         | T2b         | T2a                              | T2b         | T2a                         | T2b         | T2a                      | T2b         | T2a                  | T2b         |
| <b>Females</b>                   |             |             |                                  |             |                             |             |                          |             |                      |             |
| <b>Pre-pandemic (T1)</b>         |             |             |                                  |             |                             |             |                          |             |                      |             |
| Abstainer                        | <b>0.66</b> | <b>0.69</b> | 0.22                             | 0.22        | 0.07                        | 0.03        | .05                      | 0.04        | 0.00                 | .01         |
| Occasional drinker-no<br>binging | 0.01        | 0.01        | <b>0.35</b>                      | <b>0.52</b> | 0.41                        | 0.25        | 0.22                     | 0.21        | 0.00                 | 0.02        |
| Occasional binge drinker         | 0.00        | 0.01        | 0.14                             | 0.23        | <b>0.45</b>                 | <b>0.32</b> | 0.37                     | 0.37        | 0.03                 | 0.05        |
| Monthly binge drinker            | 0.00        | 0.04        | 0.05                             | 0.13        | 0.06                        | 0.02        | <b>0.71</b>              | <b>0.64</b> | 0.17                 | 0.17        |
| Weekly binge drinker             | 0.00        | 0.01        | .00                              | 0.00        | 0.20                        | 0.00        | 0.01                     | 0.13        | <b>0.80</b>          | <b>0.86</b> |
| <b>Early- pandemic (T2)</b>      |             |             |                                  |             |                             |             |                          |             |                      |             |
| Abstainer                        | <b>0.73</b> | <b>0.78</b> | 0.17                             | 0.18        | 0.06                        | 0.02        | 0.03                     | 0.01        | 0.01                 | 0.00        |
| Occasional drinker-no<br>binging | 0.08        | 0.03        | <b>0.50</b>                      | <b>0.56</b> | 0.27                        | 0.21        | 0.11                     | 0.17        | 0.04                 | 0.03        |
| Occasional binge drinker         | 0.09        | 0.02        | 0.23                             | 0.32        | <b>0.37</b>                 | <b>0.49</b> | 0.27                     | 0.13        | 0.04                 | 0.04        |
| Monthly binge drinker            | 0.03        | 0.03        | 0.05                             | 0.04        | 0.24                        | 0.14        | <b>0.54</b>              | <b>0.59</b> | 0.14                 | 0.18        |
| Weekly binge drinker             | 0.00        | 0.05        | 0.07                             | 0.00        | 0.14                        | 0.00        | 0.30                     | 0.18        | <b>0.48</b>          | <b>0.77</b> |
| <b>Males</b>                     |             |             |                                  |             |                             |             |                          |             |                      |             |
| <b>Pre- pandemic (T1)</b>        |             |             |                                  |             |                             |             |                          |             |                      |             |
| Abstainer                        | <b>0.68</b> | <b>0.73</b> | 0.18                             | 0.14        | 0.7                         | 0.08        | 0.06                     | 0.03        | 0.01                 | 0.02        |
| Occasional drinker-no<br>binging | 0.00        | 0.00        | <b>0.40</b>                      | <b>0.87</b> | 0.35                        | 0.01        | 0.22                     | 0.02        | 0.03                 | 0.10        |
| Occasional binge drinker         | 0.04        | 0.00        | 0.13                             | 0.00        | <b>0.30</b>                 | <b>0.65</b> | 0.49                     | 0.25        | 0.04                 | 0.01        |
| Monthly binge drinker            | 0.03        | 0.08        | 0.00                             | 0.00        | 0.11                        | 0.00        | <b>0.62</b>              | <b>0.61</b> | 0.24                 | 0.31        |
| Weekly binge drinker             | 0.05        | 0.00        | 0.09                             | 0.03        | 0.68                        | 0.46        | 0.17                     | 0.48        | <b>0.68</b>          | <b>0.46</b> |
| <b>Early- pandemic (T2)</b>      |             |             |                                  |             |                             |             |                          |             |                      |             |
| Abstainer                        | <b>0.79</b> | <b>0.80</b> | 0.14                             | 0.07        | 0.04                        | 0.03        | 0.02                     | 0.02        | 0.01                 | 0.03        |
| Occasional drinker-no<br>binging | 0.07        | 0.00        | <b>0.47</b>                      | <b>0.49</b> | 0.29                        | 0.07        | 0.13                     | 0.16        | 0.03                 | 0.07        |
| Occasional binge drinker         | 0.10        | 0.25        | 0.13                             | 0.00        | <b>0.54</b>                 | <b>0.66</b> | 0.21                     | 0.25        | 0.02                 | 0.07        |
| Monthly binge drinker            | 0.05        | 0.01        | 0.01                             | 0.00        | 0.15                        | 0.15        | <b>0.52</b>              | <b>0.52</b> | 0.28                 | 0.32        |
| Weekly binge drinker             | 0.05        | 0.24        | 0.02                             | 0.03        | 0.00                        | 0.00        | 0.17                     | 0.24        | <b>0.76</b>          | <b>0.71</b> |
